# Supplementary material for: A Role for βA3/A1-Crystallin in Type 2 EMT of RPE Cells Occurring in Dry Age-Related Macular Degeneration
Source: PubMed Central journal article supplement — Invest Ophthalmol Vis Sci. 2018 Jul;59(4):AMD104–13. doi: 10.1167/iovs.18-24132 (PMC6058694; doi:10.1167/iovs.18-24132), 2018-07
Supplement: iovs-59-08-28_s01.pdf [file iovs-59-08-28_s01.pdf]

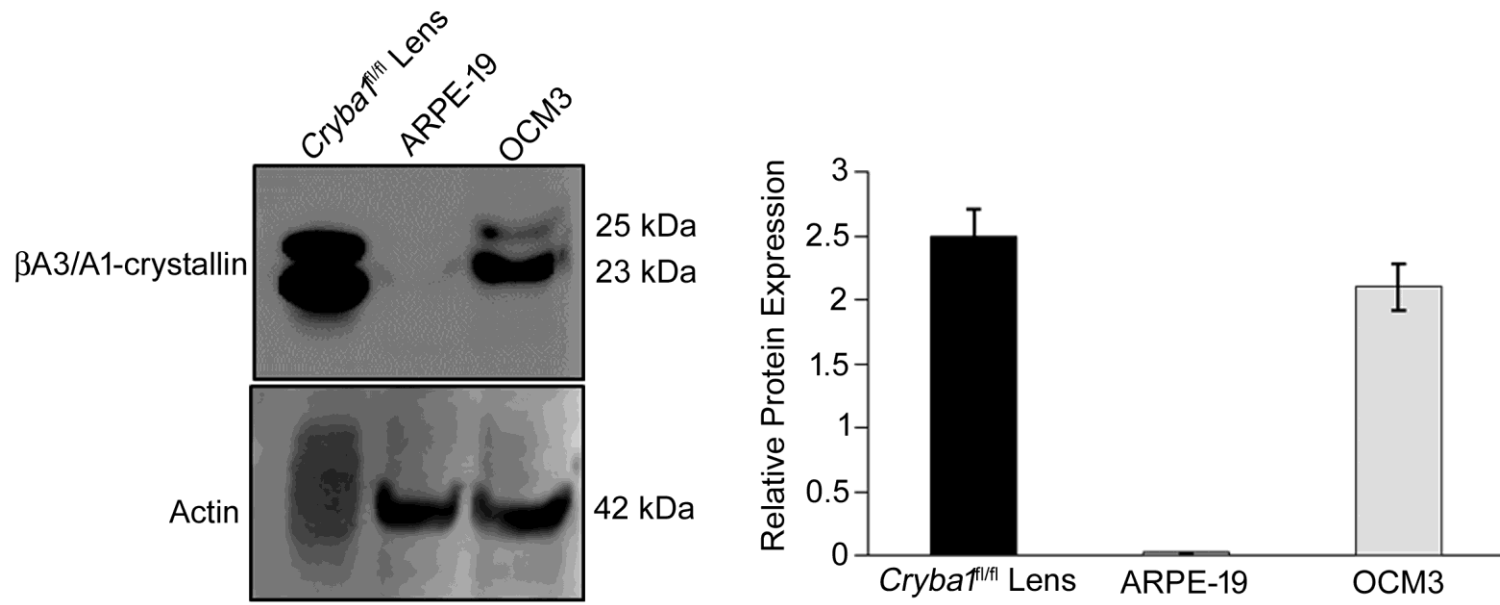

Supplemental Figure 1:  $\beta$ A3/A1-crystallin protein is expressed in ocular melanoma cells.  $\beta$ A3/A1-crystallin protein was shown to be expressed in ocular melanoma OCM3 cells, but not in non-polarized ARPE-19 cells. Protein lysates from the lens of *Cryba1<sup>fl/fl</sup>* mice were used as a positive control for  $\beta$ A3/A1-crystallin expression. All values are Mean  $\pm$  S.D, n = 3.
