# Supplementary material for: A Role for βA3/A1-Crystallin in Type 2 EMT of RPE Cells Occurring in Dry Age-Related Macular Degeneration
Source: PubMed Central journal article supplement — Invest Ophthalmol Vis Sci. 2018 Jul;59(4):AMD104–13. doi: 10.1167/iovs.18-24132 (PMC6058694; doi:10.1167/iovs.18-24132), 2018-07
Supplement: iovs-59-08-28_s02.pdf [file iovs-59-08-28_s02.pdf]

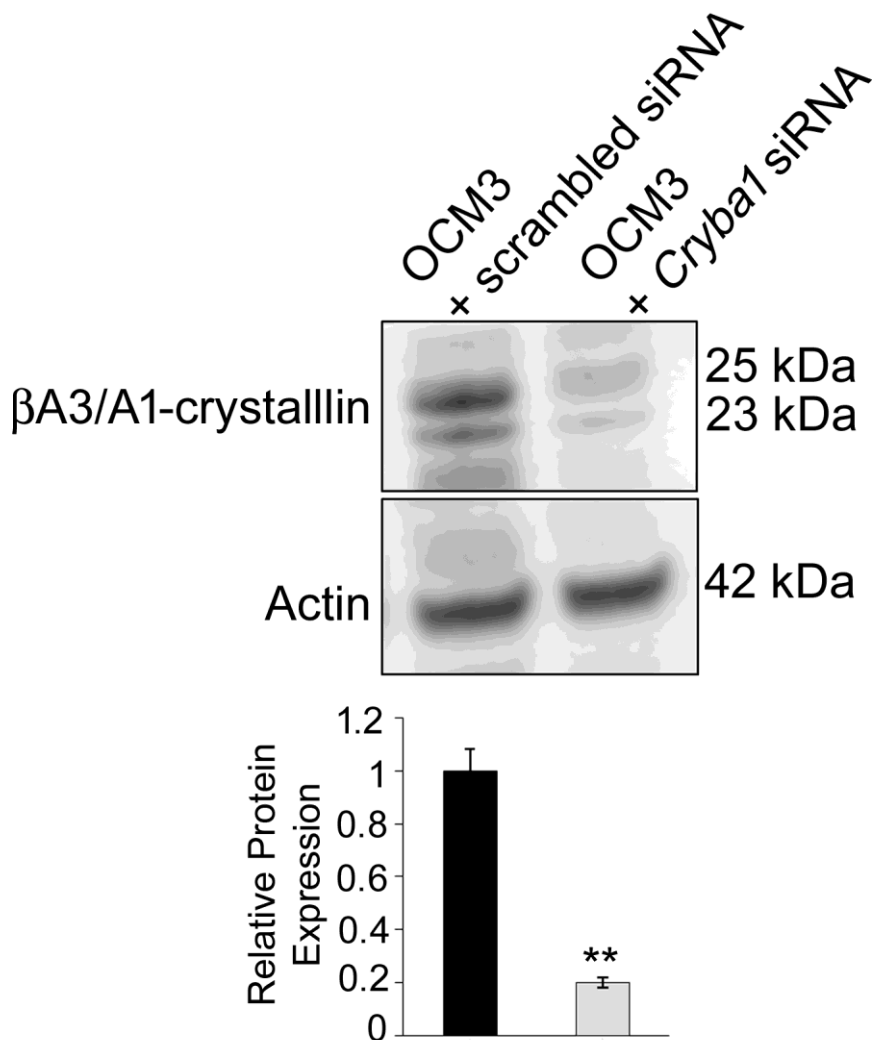

**Supplementary Figure 2:** The expression of  $\beta$ A3/A1-crystallin in OCM3 cells transfected with *Cryba1* siRNA. The expression of  $\beta$ A3/A1-crystallin were significantly lower in *Cryba1* siRNA (300pmole) transfected OCM3 cells, compared to cells transfected with scrambled siRNA. The graph show Mean  $\pm$  S.D and \*\* $p < 0.01$  (Mann-Whitney test),  $n = 4$ .
